# Supplementary material
Source: ML conference proceedings conference paper supplement (https://openreview.net/forum?id=6fDjUoEQvm)
Supplement: supplementary_material [file attachment]

## A APPENDIX

### A.1 DATASET SPECIFICATION

| Domain/Attribute       | # of Cause Example | # of IsolateExample | # of Entity |
|------------------------|--------------------|---------------------|-------------|
| <b>City</b>            | 34899/7016         | 49500/9930          | 3552/3374   |
| Country                | 7925/1544          | 8250/1655           | 3528/2411   |
| Language               | 6207/1252          | 8250/1655           | 3471/2221   |
| Continent              | 8254/1658          | 8250/1655           | 3543/2567   |
| Timezone               | 5371/1144          | 8250/1655           | 3414/1900   |
| Latitude               | 3813/743           | 8250/1655           | 3107/1519   |
| Longitude              | 3329/675           | 8250/1655           | 2989/1357   |
| <b>Nobel Laureate</b>  | 39771/6754         | 44628/7600          | 928/928     |
| Country of Birth       | 7218/1356          | 8908/1520           | 928/909     |
| Award Year             | 11037/1904         | 8930/1520           | 928/926     |
| Gender                 | 854/96             | 8930/1520           | 592/149     |
| Field                  | 9518/1558          | 8930/1520           | 928/922     |
| Birth Year             | 11144/1840         | 8930/1520           | 928/927     |
| <b>Occupation</b>      | 54444/1582         | 29052/864           | 799/785     |
| Work Location          | 24216/724          | 9684/288            | 799/708     |
| Duty                   | 12090/371          | 9684/288            | 785/522     |
| Industry               | 18138/487          | 9684/288            | 799/600     |
| <b>Physical Object</b> | 49114/4659         | 35285/3636          | 563/563     |
| Color                  | 14707/1518         | 8825/909            | 563/563     |
| Category               | 13540/1273         | 8820/909            | 563/562     |
| Texture                | 14666/1265         | 8821/909            | 563/561     |
| Size                   | 6201/603           | 8819/909            | 563/528     |
| <b>Verb</b>            | 70003/3806         | 14396/782           | 986/984     |
| Past Tense             | 34043/1848         | 7188/391            | 986/975     |
| Singular               | 35960/1958         | 7208/391            | 986/978     |

Table 1: The details of the dataset used for the experiment, in the format of train/test splits. For every model in each setting. Methods are trained on the full dataset of that setting with 5 epochs. The prompts used by the train/test splits are completely disjoint.

### A.2 INFORMATION MASKING

Figure 10 shows how the HyperDAS may learn a trivial solution to the RAVEL benchmark if the relevant information (base prompt attribute) is not properly masked.

### A.3 SUBSPACE DIMENSION

We experiment with different feature subspace dimension, as shown in Figure 11.

### A.4 INTERVENTION PATTERNS

Here we include a few demonstrations of the intervention pattern that HyperDAS generates on RAVEL, as shown in Figure 12.

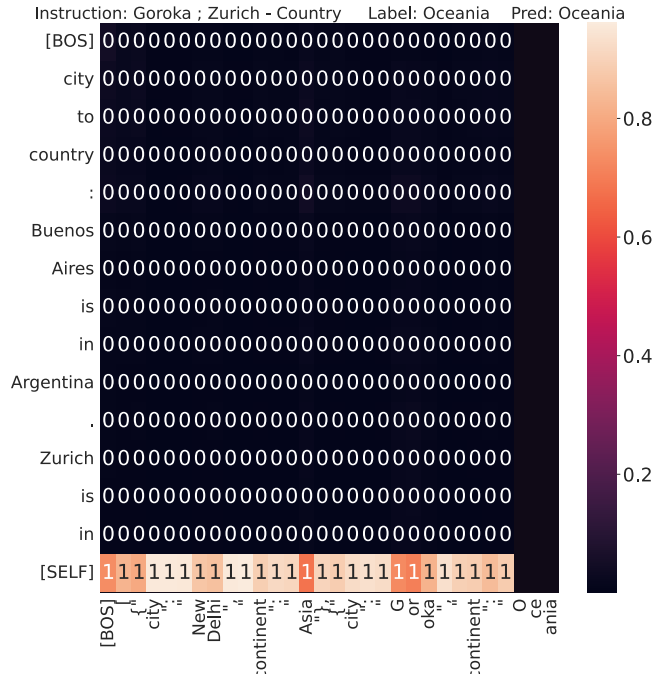

Figure 10: The trivial solution learnt by the HyperDAS on isolate examples when no mask is applied on the attribute token in the prompt. HyperDAS learns to do no intervention at all if it sees the base prompt attribute to be different than the attribute in the instruction.

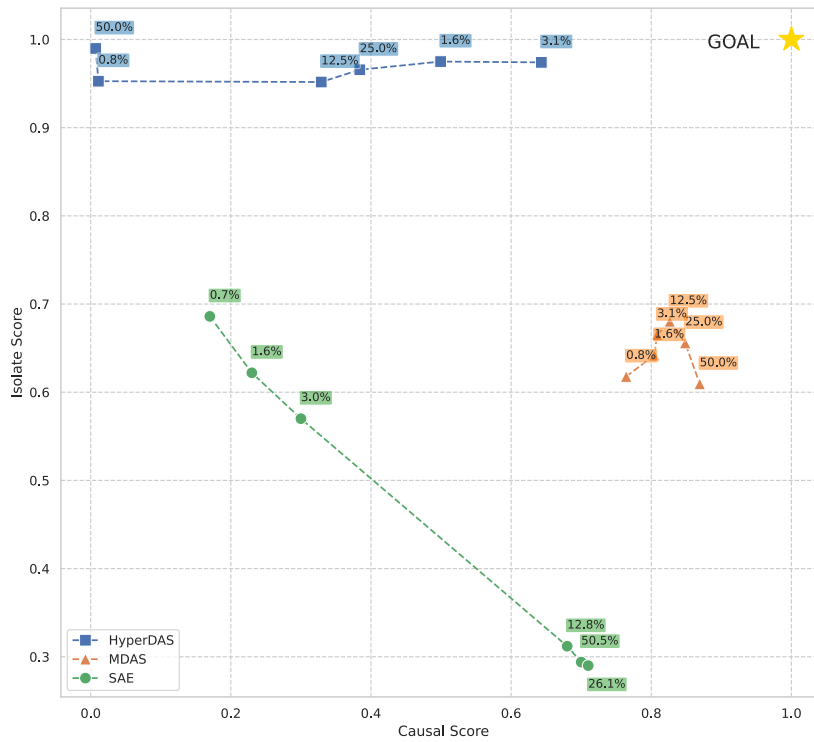

Figure 11: Cause and Iso scores for HyperDAS, MDAS, and SEA when using different feature size shown as the ratio %.

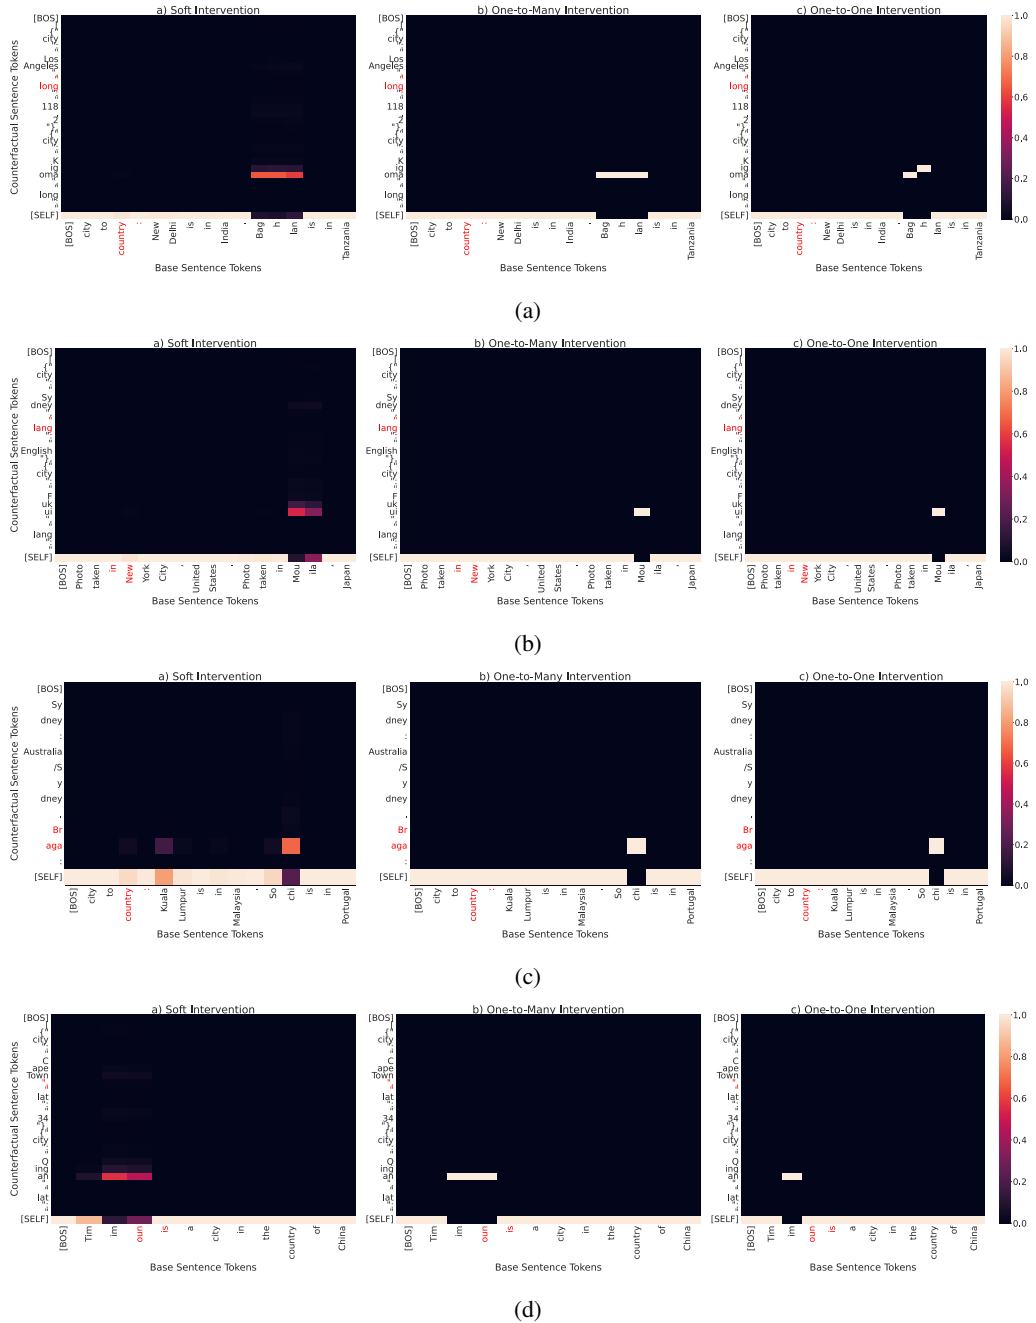

Figure 12: Four types of intervention patterns.
