# Supplementary material
Source: ML conference proceedings conference paper supplement (https://openreview.net/forum?id=6fDjUoEQvm)

Soft Intervention

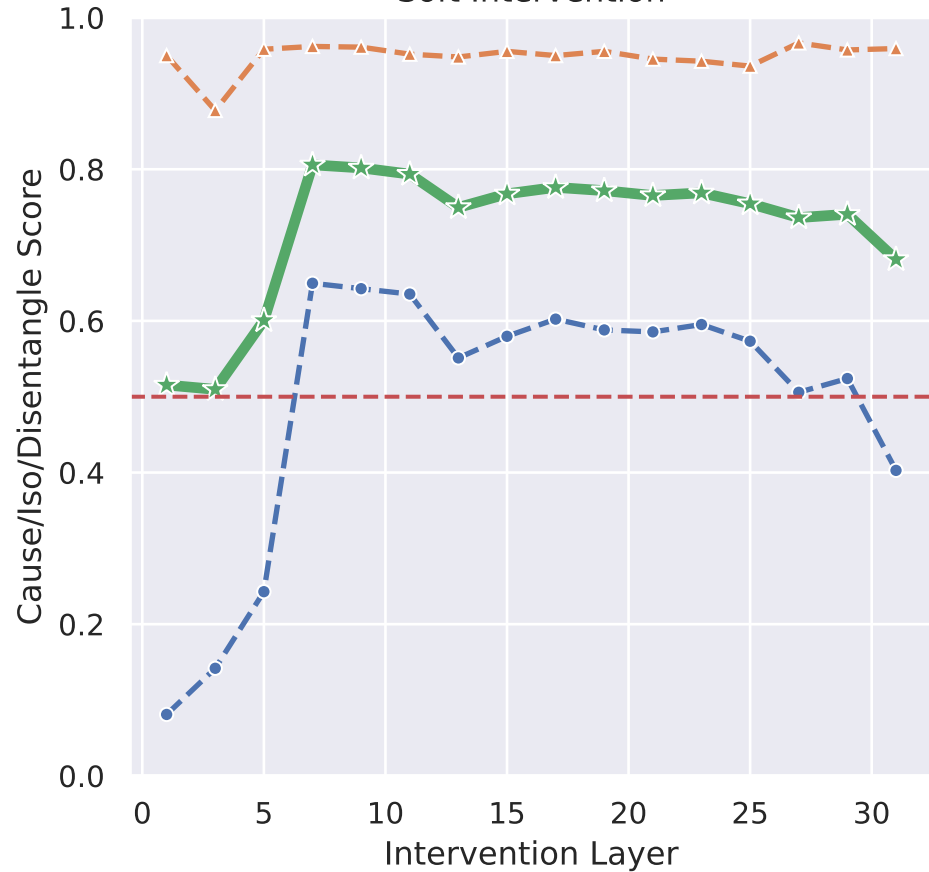

One-to-Many Intervention

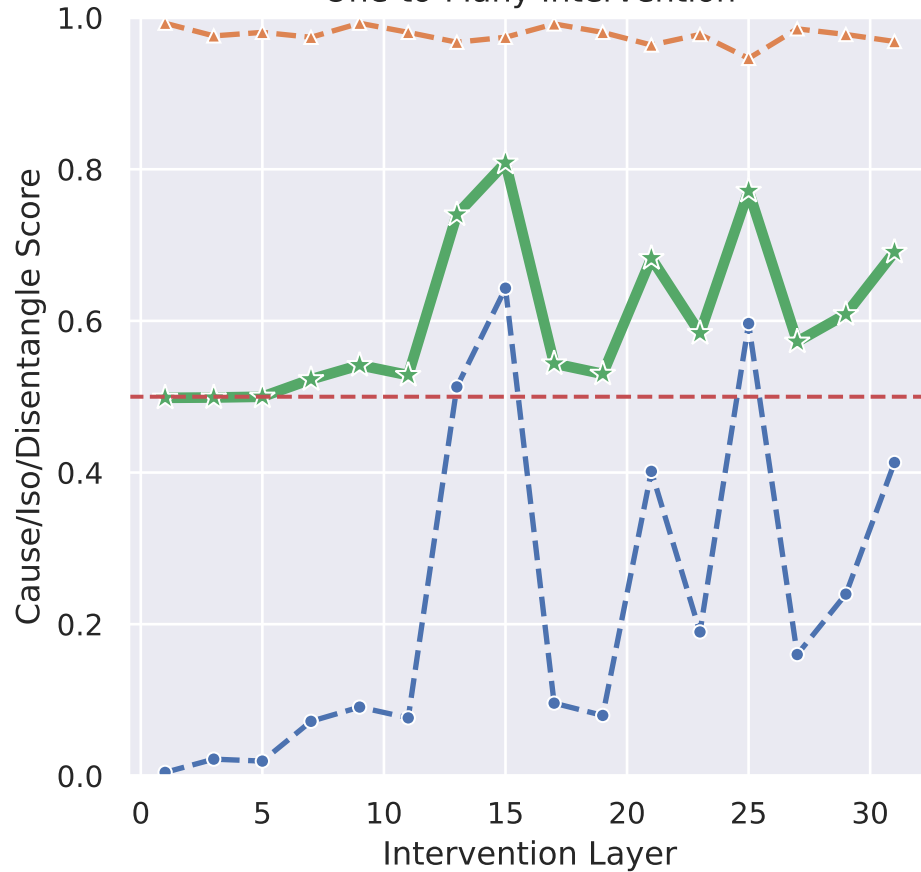

One-to-One Intervention

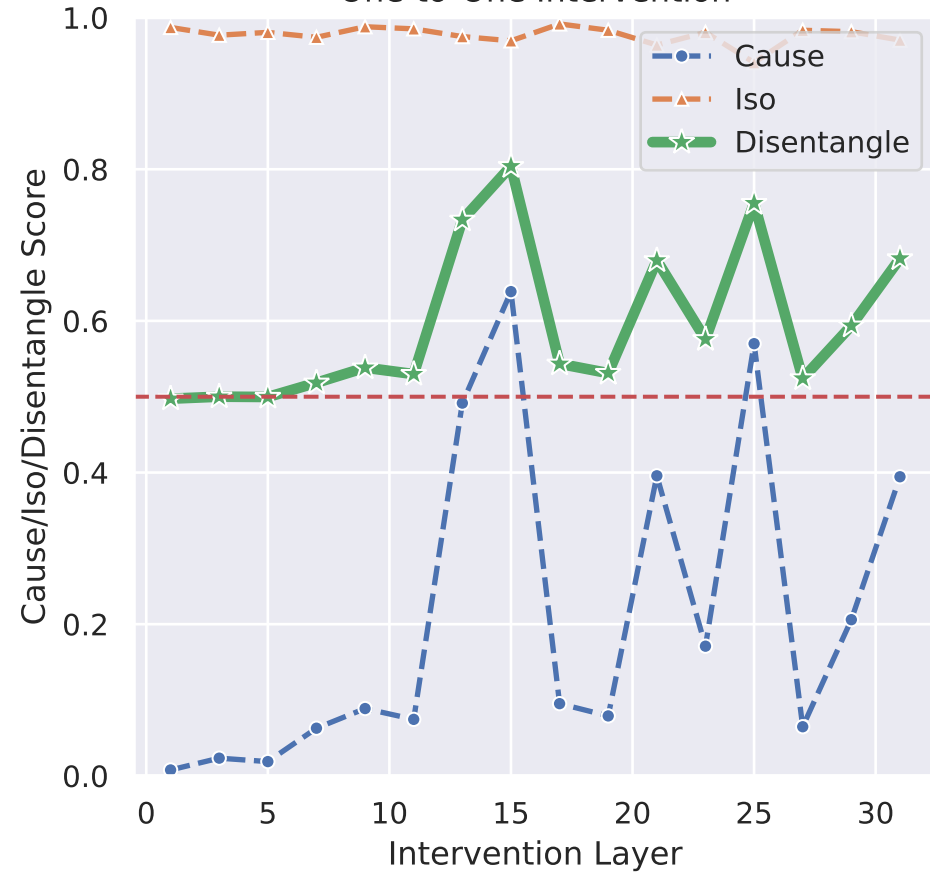

Supplement: supplementary_material [file attachment]
